# Supplementary material for: Polydimethylsiloxane nanocomposite macroporous films preparedviaPickering high internal phase emulsions as effective dielectrics for enhancing the performance of triboelectric nanogenerators
Source: Royal Society of Chemistry journal article supplement (doi:10.1039/d0ra07934k), 2020-12-23
Supplement: d0ra07934k1.pdf [file d0ra07934k1.pdf]

## Supporting information:

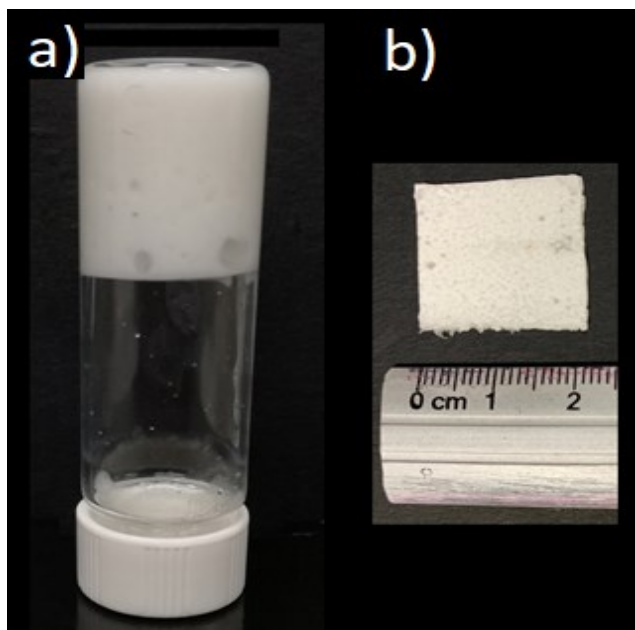

**Figure S1.** Photographs of a) water-in-PDMS HIPE and b) polyHIPE film.

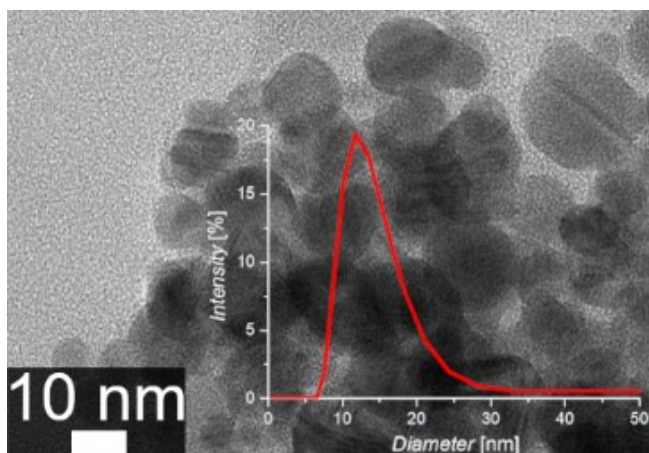

**Figure S2.** TEM micrograph of Ag-Nps, size distribution from Dynamic Light Scattering (DLS) analysis. (Red curve).

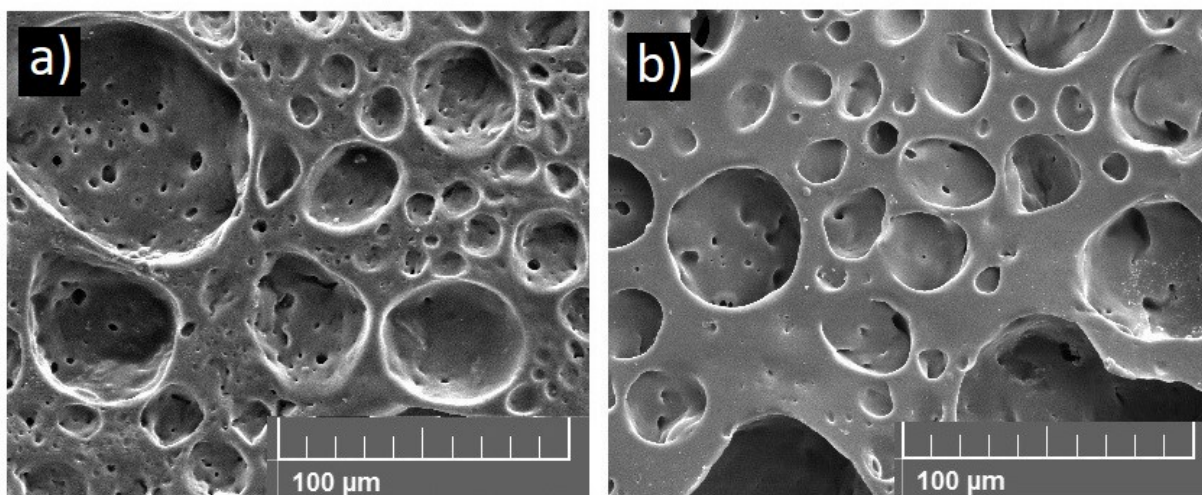

**Figure S3.** FESEM micrographs of a) polyHIPE@0 and b) polyHIPE@4

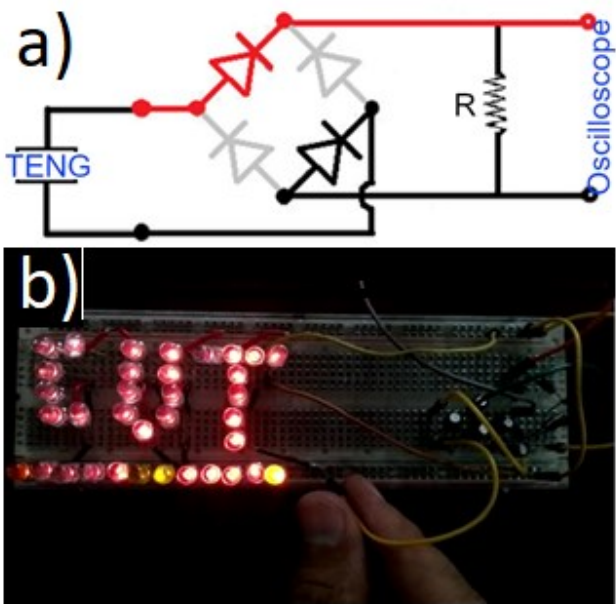

**Figure S4.** a) Circuit used to measure the output current, where a resistance of  $2.7\text{ M}\Omega$  was used connected in parallel to a diode bridge that rectifies the signal. b) digital photographs of red LEDs lit by the polyHIPE@20-TENG.
